# Supplementary material for: A Highly Efficient Cell Division-Specific CRISPR/Cas9 System Generates Homozygous Mutants for Multiple Genes in Arabidopsis
Source: PubMed Central journal article supplement (PMC6321140; doi:10.3390/ijms19123925), 2018-12-07
Supplement: ijms-19-03925-s001.pdf [file ijms-19-03925-s001.pdf]

**A highly efficient cell division-specific CRISPR/Cas9 system generates homozygous mutants for multiple genes in *Arabidopsis***

Zhengyan Feng<sup>1</sup>, Zhengjiang Zhang<sup>1,2</sup>, Kai Hua<sup>1,2</sup>, Xifeng Gao<sup>1,2</sup>, Yanfei Mao<sup>1</sup>, Jose Ramon Botella<sup>3</sup>, Jian-Kang Zhu<sup>1,4</sup>

The following Supporting Information is available for this article:

**Figure S1.** Characterization of mutations in individual multi-CRISPR/Cas9 binary vectors in the T1 generation.

- (a) Identification of T1 generation mutations from individual multi-pUBQ-Cas9 binary vectors.
- (b) Identification of T1 generation mutations from individual multi-pCDC45-Cas9 binary vectors.

The number of target sites showing non-chimeric mutations, chimeric mutations and Wild-type is indicated. Sequencing results of all loci from a single binary vector are shown in the graph.

**Figure S2.** Analysis of mutation frequencies induced by the different Pol III promoters.

- (a) Zygosity of mutations induced by the CDC45-15 construct in 10 T2 plants from one individual T1 line (#7).
- (b) Zygosity of mutations induced by the CDC45-9 construct in 10 T2 plants from one individual T1 line (#7).

**Figure S3.** Editing efficiency vs. target GC content.

- a, Editing efficiencies of all 74 target sites for pUBQ-Cas9 system.
- b, Editing efficiencies of all 93 target sites for pCDC-Cas9 system.

**Table S1.** Phenotypic characterization of T1 generation.

**Table S2.** Mutation analysis of T1 generation.

**Table S3.** Phenotypic analysis of the T2 population segregated from 10 individual T1 lines.

**Table S4.** Mutation frequencies for different Cas9 systems in the T2 generation.

**Table S5.** Summary of mutagenesis frequency induced by the multi-AtUBQ-Cas9 system at 74 target sites in the T1 generation.

**Table S6.** Summary of mutagenesis frequencies induced by the multi-pCDC45-Cas9 system at 93 target sites in the T1 generation.

**Table S7.** List of primers used in the study.

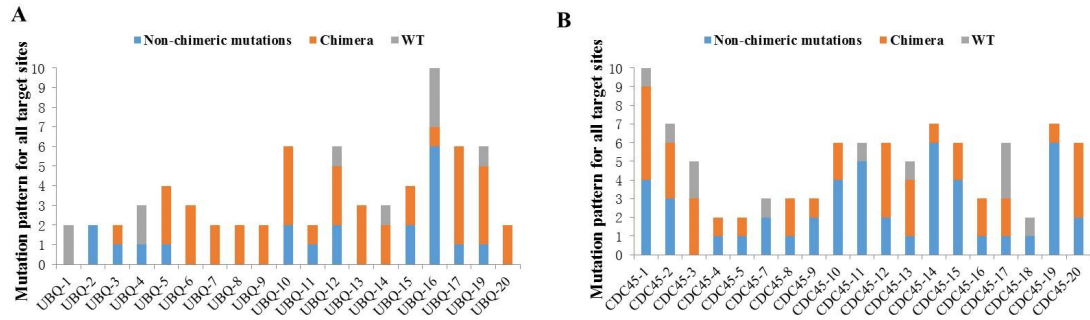

**Figure S1.** Characterization of mutations in individual multi-CRISPR/Cas9 binary vectors in the T1 generation.

(A) Identification of T1 generation mutations from individual multi-pUBQ-Cas9 binary vectors.

(B) Identification of T1 generation mutations from individual multi-pCDC45-Cas9 binary vectors.

The number of target sites showing non-chimeric mutations, chimeric mutations and Wild-type is indicated. Sequencing results of all loci from a single binary vector are shown in the graph.

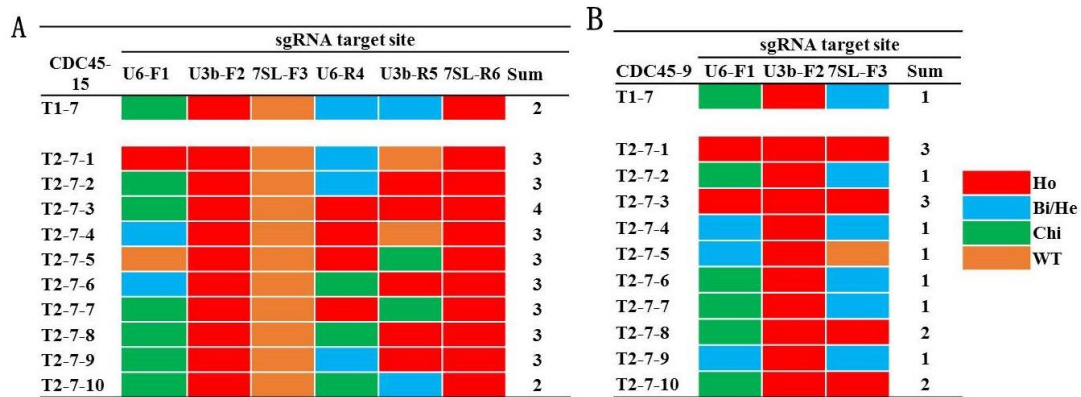

**Figure S2.** Analysis of mutation frequencies induced by the different Pol III promoters.

(A) Zygosity of mutations induced by the CDC45-15 construct in 10 T2 plants from one individual T1 line (#7).

(B) Zygosity of mutations induced by the CDC45-9 construct in 10 T2 plants from one individual T1 line (#7). Sum: The number of target genes with homozygous mutation in individual plant.

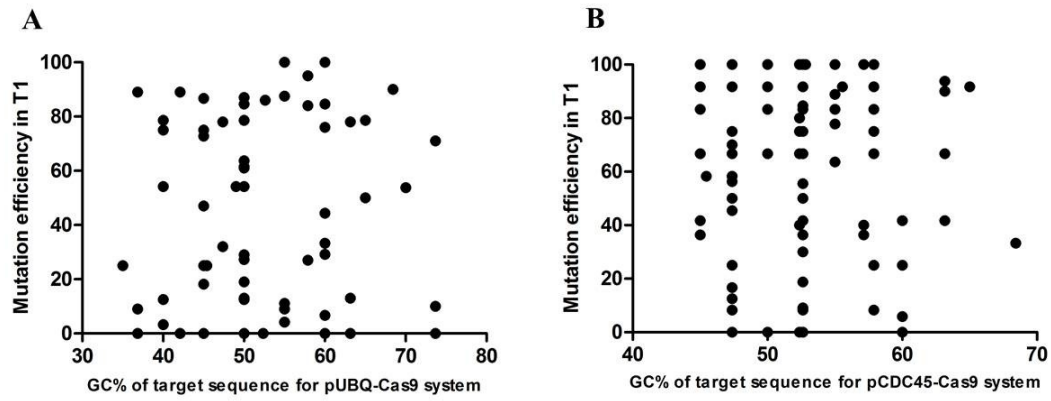

**Figure S3.** Editing efficiency vs. target GC content.

(A) Editing efficiencies of all 74 target sites for pUBQ-Cas9 system.

(B) Editing efficiencies of all 93 target sites for pCDC-Cas9 system.

**Table S1.** Phenotypic characterization of T1 generation.

|                      | Phenotypic characterization of T1 generation (%) |         |           |
|----------------------|--------------------------------------------------|---------|-----------|
|                      | Uniform phenotype                                | Chimera | Wild-type |
| p2x35S-Cas9-sgR97    | 0                                                | 0       | 100       |
| pCDC45-Cas9-sgR97    | 23.5                                             | 68.1    | 8.7       |
| pSPO11-Cas9-sgR97    | 0                                                | 5.5     | 94.5      |
| pDMC1-Cas9-sgR97     | 0                                                | 8.3     | 91.7      |
| pYAO-Cas9-sgR97-Nos  | 20                                               | 70      | 10        |
| pYAO-Cas9-sgR97-YaoT | 25.4                                             | 58      | 20.3      |

**Table S2.** Mutation analysis of T1 generation.

|                 | Zygoty of T1 generation     |                |                  | Total |
|-----------------|-----------------------------|----------------|------------------|-------|
|                 | NO. of non-chimeric mutants | NO. of chimera | NO. of wild-type |       |
| p2x35S-Cas9-Nos | 0                           | 1              | 42               | 43    |
| pCDC45-Cas9-Nos | 3 (4.4%)                    | 52             | 13               | 68    |
| pSPO11-Cas9-Nos | 0                           | 56             | 8                | 64    |
| pDMC1-Cas9-Nos  | 0                           | 28             | 2                | 30    |
| pYAO-Cas9-Nos   | 4 (10%)                     | 36             | 0                | 40    |
| pYAO-Cas9-YaoT  | 3 (5.1%)                    | 50             | 6                | 59    |

**Table S3.** Phenotypic analysis of the T2 population segregated from 10 individual T1 lines.

|                 | Phenotypic segregation of T2 plants |        |                            |        | Total |           |
|-----------------|-------------------------------------|--------|----------------------------|--------|-------|-----------|
|                 | Uniform glabrous phenotype          |        | Partial glabrous phenotype |        |       | Wild-type |
| p2x35S-Cas9-Nos | 0                                   | 0.00%  | 55                         | 5.68%  | 913   | 968       |
| pCDC45-Cas9-Nos | 443                                 | 22.73% | 365                        | 18.73% | 1141  | 1949      |
| pSPO11-Cas9-Nos | 13                                  | 0.70%  | 97                         | 5.24%  | 1740  | 1850      |
| pDMC1-Cas9-Nos  | 40                                  | 3.94%  | 108                        | 10.63% | 868   | 1016      |
| pYAO-Cas9-Nos   | 302                                 | 24.47% | 250                        | 20.26% | 682   | 1234      |
| pYAO-Cas9-YaoT  | 217                                 | 16.13% | 197                        | 14.65% | 931   | 1345      |

The T2 seeds were sown on 1/2 MS medium and evaluated after 2 weeks.

**Table S4.** Mutation frequencies for different Cas9 systems in the T2 generation.

|                 | NO.of<br>homozygotes | NO.of<br>heterozygotes<br>or Bi-allele | NO.of chimera | NO.of<br>wild-type | NO.of<br>total<br>plants |
|-----------------|----------------------|----------------------------------------|---------------|--------------------|--------------------------|
| 2x35S-Cas9-Nos  | 0                    | 0                                      | 7             | 81                 | 88                       |
| pCDC45-Cas9-Nos | 49                   | 17                                     | 45            | 50                 | 161                      |
| pYAO-Cas9-Nos   | 41                   | 30                                     | 71            | 12                 | 154                      |
| pYAO-Cas9-yaoT  | 25                   | 25                                     | 56            | 48                 | 154                      |

**Table S5.** Summary of mutagenesis frequency induced by the multi-AtUBQ-Cas9 system at 74 target sites in the T1 generation.

| Constructs | NO.of<br>sgRNA in a<br>vector | relative<br>position to<br>Cas9 in vector | Target gene | promoter | Target Sequence      | PAM<br>sequence | length of<br>Target | GC<br>content | mutation<br>efficiency in<br>T1 | homozygous<br>ratio(sequencing<br>in T1 ) |
|------------|-------------------------------|-------------------------------------------|-------------|----------|----------------------|-----------------|---------------------|---------------|---------------------------------|-------------------------------------------|
| UBQ-1      | 2                             | F1                                        | AT2G30350   | AtU6     | GTCGGTGAGGATGGAGTCAC | CGGAAA          | 20                  | 60            | 0                               | 0                                         |
|            |                               | R4                                        |             | AtU6     | CGGAGAATAAGGCAGCACAA | TGGAGA          | 20                  | 50            | 0                               | 0                                         |
| UBQ-2      | 2                             | F1                                        | AT2G30350   | AtU6     | TCACGGTATCACTATCATGA | TGGGTA          | 20                  | 40            | 78.6                            | 25                                        |
|            |                               | R4                                        |             | AtU6     | GACGACTGAGGTTGATGTAG | AGGTGA          | 20                  | 50            | 78.6                            | 25                                        |
| UBQ-3      | 2                             | F1                                        | AT5G53800   | AtU6     | AACGATTCCGGCTCTGAATC | TGGTTT          | 20                  | 50            | 13                              | 0                                         |
|            |                               | R4                                        |             | AtU6     | AACGTCCAGAGTTCACAGCA | TGGTTG          | 20                  | 50            | 87                              | 21.7                                      |
| UBQ-4      | 3                             | F1                                        | AT1G48410   | AtU6     | GAGCCAGAGACATCAGACAG | TGGCTC          | 20                  | 55            | 100                             | 0                                         |
|            |                               | F2                                        | AT1G69440   | AtU3B    | TGATAAGGCTTGTGGAGAAG | AGGTGT          | 20                  | 45            | 0                               | 0                                         |
|            |                               | F3                                        | AT5G43810   | At7SL    | CACCGTCAAAGAATCGTAGC | CGGAGG          | 20                  | 50            | 0                               | 0                                         |
| UBQ-5      | 3                             | F1                                        | AT1G31280   | AtU6     | GCGTGATGTGTTGCAAGGAA | TGGATG          | 20                  | 50            | 61.5                            | 0                                         |
|            |                               | F1                                        | AT1G31290   |          | TGGATG               | 20              | 50                  | 84.6          | 0                               |                                           |
|            |                               | F2                                        | AT2G27040   | AtU3B    | GGGGCCAGTTCGAGTTCCTA | TGGCTC          | 20                  | 60            | 84.6                            | 0                                         |
|            |                               | F3                                        | AT2G32940   | At7SL    | AGACGTGGGGTTGGAACCAC | AGGCAA          | 20                  | 60            | 100                             | 15                                        |
| UBQ-6      | 6                             | R4                                        | AT2G27880   | AtU6     | GTTTCCGCCGGTAGAGGTCG | TGGAAA          | 20                  | 65            | 50                              | 0                                         |
|            |                               | R5                                        | AT5G21030   | AtU3B    | CGCCGTGGCAACGGTTCCAA | AGGACA          | 20                  | 65            | 78.6                            | 0                                         |
|            |                               | R6                                        | AT5G21150   | At7SL    | CCTCGAGGCAGCGGCTCCAA | AGGACA          | 20                  | 70            | 53.8                            | 0                                         |
| UBQ-7      | 2                             | F1                                        | AT1G69120   | AtU6     | GGGTAGGGTTCAATTGAAG  | AGGATA          | 19                  | 47.37         | 32                              | 0                                         |
|            |                               | R4                                        |             | AtU6     | TGAAGTTACCAAGAATCAG  | TGGAGT          | 19                  | 36.84         | 9                               | 0                                         |
| UBQ-8      | 2                             | F1                                        | AT5G13930   | AtU6     | AGAGAGCTGATGGACCTGC  | AGGCAT          | 19                  | 57.9          | 84                              | 0                                         |
|            |                               | R4                                        |             | AtU6     | AGGCGACAAGTCGACAATT  | CGGAAA          | 19                  | 47.37         | 78                              | 0                                         |
| UBQ-9      | 2                             | F1                                        | AT4G18480   | AtU6     | CCCCCATTTGCTTCAGGCC  | AGGTAA          | 19                  | 60            | 76                              | 0                                         |

|        |   |    |           |                     |                       |        |       |       |      |      |
|--------|---|----|-----------|---------------------|-----------------------|--------|-------|-------|------|------|
|        |   | R4 | AtU6      | GACATTCATAACAGAGACA | TGGTAA                | 19     | 36.84 | 89    | 0    |      |
| UBQ-10 | 6 | F1 | AT1G70790 | AtU6                | GTCAGTTGTTTCGTTCCACAC | TGGATT | 20    | 50    | 54.2 | 4.2  |
|        |   | F2 | AT1G66360 | AtU3B               | CCCATACGGACAATGACATA  | AGGATC | 20    | 45    | 25   | 0    |
|        |   | F3 | AT1G23140 | At7SL               | CGTCGTAACCATGGGTTCCTC | AGGTAT | 20    | 55    | 4.2  | 0    |
|        |   | R4 | AT1G70810 | AtU6                | CTGCAACCCTGAGTGGAACG  | AGGAAT | 20    | 60    | 33.3 | 8.3  |
|        |   | R5 | AT2G01540 | AtU3B               | GCTGCTACGATGGTCGCGAA  | TGGCGA | 20    | 60    | 29.2 | 0    |
|        |   | R6 | AT1G73580 | At7SL               | GCTGCTGGAAACATCACGTA  | CGGCGA | 20    | 50    | 12.5 | 0    |
| UBQ-11 | 2 | F  | AT1G70800 | AtU6                | CGTCATAACCATGGGTCCAC  | AGGTAC | 20    | 55    | 87.5 | 20.8 |
|        |   | R  | AT1G48590 | AtU6                | CTCCGTATTTCGCATCAAACG | CGGCGT | 20    | 50    | 54.2 | 0    |
| UBQ-12 | 6 | F1 | AT2G46440 | AtU6                | GACCGTCTTGTTAGCTTGCG  | TGGTTG | 20    | 55    | 9    | 0    |
|        |   | R4 | AT2G46450 | AtU6                | CGTTCTCAAGCATCTTTGAG  | TGGTTG | 20    | 45    | 72.8 | 27.3 |
|        |   | F2 | AT2G46430 | AtU3B               | TCTTCTAGTGGTTTCGGCAG  | AGGAGA | 20    | 50    | 63.7 | 18.2 |
|        |   | R5 | AT2G46430 | AtU3B               | GTAACGAAACTGCTTGGGC   | TGGTGC | 20    | 50    | 27.3 | 0    |
|        |   | F3 | AT1G01340 | At7SL               | TAGAACGAGAAGACAGATGC  | TGGC   | 20    | 45    | 18.2 | 0    |
|        |   | R6 | AT4G01010 | At7SL               | TTCTTCTACTGCTTCTGGTG  | GGGT   | 20    | 45    | 0    | 0    |
| UBQ-13 | 3 | F1 | AT4G25470 | AtU6                | TCGCCGCCATAGCTCTCCG   | TGGCAG | 19    | 68.42 | 90   | 0    |
|        |   | F2 | AT4G25480 | AtU3B               | GGCTTGAGACTCCGAATCC   | CGGAAT | 20    | 60    | 6.7  | 0    |
|        |   | F3 | AT4G25490 | AtAt7SL             | GGACTTTCCAAACCGCTGAGA | TGGCAG | 21    | 52.38 | 0    | 0    |
| UBQ-14 | 3 | F1 | AT4G25470 | AtU6                | TCGCCGCCATAGCTCTCCG   | TGGCAG | 19    | 68.42 | 90   | 0    |
|        |   | F2 | AT4G25490 | AtU3B               | TCGCTGCATTAGCCCTCCG   | TGGCCG | 19    | 63.16 | 0    | 0    |
|        |   | F3 | AT4G25480 | At7SL               | GCGGCGGCTGAAGCTGCGT   | TGGCGT | 19    | 73.68 | 10   | 0    |
| UBQ-15 | 4 | F1 | AT4G36820 | AtU6                | GCCACGATTGATCCAGAGCC  | TGGAGA | 20    | 60    | 44.4 | 11.1 |
|        |   | F2 | AT2G23790 | AtU3B               | CAGTGCTATGATTAGGCCGG  | CGGAGA | 20    | 55    | 11.1 | 0    |
|        |   | R1 | AT1G09570 | AtU6                | AGGACATGGCTTGGTCACGG  | TGGATT | 20    | 60    | 100  | 37.5 |
|        |   | R2 | AT5G42610 | AtU3B               | CAGTACATGACTTCACCTAA  | TGGTCC | 20    | 40    | 12.5 | 0    |

|        |           |       |                      |        |                        |        |    |       |      |      |
|--------|-----------|-------|----------------------|--------|------------------------|--------|----|-------|------|------|
| UBQ-16 | 6         | F1    | AT4G22120            | AtU6   | TATCTCCGGATTTACTGGCT   | CGGGTA | 20 | 45    | 75   | 0    |
|        |           |       | AT4G04340            |        |                        | GGGGTA | 20 | 45    | 75   | 8.3  |
|        |           | R4    | AT1G62320            | AtU6   | ATCATCGTTAGAGAGAAGAG   | CGGCTT | 20 | 49    | 54.2 | 8.3  |
|        |           |       | AT1G11960            |        |                        | CGGCTT | 20 | 40    | 54.2 | 8.3  |
|        |           | F2    | AT4G15430            | AtU3B  | TTCCCTAAATGGTATCTCAA   | GGGTTT | 20 | 35    | 25   | 8.3  |
|        |           |       | AT3G21620            |        |                        | GGGCTT | 20 | 35    | 25   | 8.3  |
|        |           | R5    | AT4G15430            | AtU3B  | TTTTGGGTGCATTTGTGTA    | TGGCTT | 19 | 36.84 | 0    | 0    |
|        |           |       | AT3G21620            |        |                        | TGGCTT | 19 | 36.84 | 0    | 0    |
|        |           | R6    | AT4G02900            | At7SL  | TCAGGCATTTGAAGAGCAGC   | AGGCAT | 20 | 50    | 29   | 8.3  |
| F3     | AT1G32090 | At7SL | CGCTCCGACAGAACTCTCGT | CGGAAA | 20                     | 60     | 0  | 0     |      |      |
| UBQ-17 | 6         | F1    | AT5G46790            | AtU6   | CGGTGGTGAACATAGGCTG    | AGGAAT | 19 | 57.9  | 95   | 28.6 |
|        |           | F2    | AT4G17870            | AtU3B  | AGTTGGTATGTGTGGAAC     | CGGCGA | 19 | 42.1  | 89   | 0    |
|        |           | F3    | AT2G38310            | At7SL  | GCGGAGACGGCGATAACGT    | TGGTAG | 19 | 63.16 | 13   | 0    |
|        |           | R4    | AT2G26040            | AtU6   | CGCTCCGGCCTCCGTGGTT    | TGGCCT | 19 | 73.68 | 71   | 0    |
|        |           | R5    | AT5G53160            | AtU3B  | TTTGTCGTATCCGACGCGG    | AGGTAT | 19 | 57.9  | 27   | 0    |
|        |           | R6    | AT5G05440            | At7SL  | AGCCTCACGATCAGACCGA    | TGGTCC | 19 | 57.9  | 27   | 0    |
| UBQ-18 | 6         | F2    | AT5G53160            | AtU3B  | ACATCATAAGCATGAGCTTG   | TGGATA | 20 | 40    | 3.3  | 0    |
| UBQ-19 | 6         | F1    | AT4G01026            | AtU6   | ACACTGGTTCTCTCTGCAG    | TGGTGA | 19 | 52.63 | 86   | 13.2 |
|        |           | F2    | AT1G73000            | AtU3B  | GCACACCGTGTAGACGCAC    | CGGCAC | 19 | 63.16 | 78   | 0    |
|        |           | F3    | AT2G40330            | At7SL  | GTGAGCCTCACGCGCGGGA    | TGGCTG | 19 | 73.68 | 0    | 0    |
|        |           | R4    | AT1G01360            | AtU6   | TCGAGACGGTGAATACGTA    | CGGACG | 20 | 50    | 61   | 0    |
|        |           | R5    | AT5G45860            | AtU3B  | ATGCTCCACTATCTCTAGTT   | TGGTCA | 20 | 40    | 75   | 0    |
|        |           | R6    | AT5G45870            | At7SL  | ATGCTCCGTTACCTCTAGTA   | TGGTCG | 20 | 45    | 47   | 0    |
| UBQ-20 | 2         | F1    | AT4G27920            | AtU6   | GAGGTTGGTAGCGTAAGAGAAG | TGGATT | 22 | 50    | 19   | 0    |
|        |           | R4    | AT4G18620            | AtU6   | TGAAGCACCATTACCACTAGTG | TGGTCC | 22 | 45.4  | 25   | 0    |



|        |   |    |           |       |                      |        |    |       |      |      |
|--------|---|----|-----------|-------|----------------------|--------|----|-------|------|------|
| UBQ-21 | 6 | R5 | AT2G40330 | AtU3B | TCTGAAACTGTATCGACGT  | TGGCAT | 19 | 42.11 | 0    | 0    |
|        |   | R6 | AT2G40330 | At7SL | GAGCTTTCCCACACGCACG  | TGGTTG | 19 | 63.16 | 0    | 0    |
| UBQ-22 | 3 | F1 | AT4G27920 | AtU6  | ATCAGTAGGTGTGTGGTACA | AGGTAA | 20 | 45    | 86.7 | 13.3 |

22 binary vectors with 70 sgRNAs were introduced into *Arabidopsis* by the flower dip method. The PAM sequences are shown in red.

**Table S6.** Summary of mutagenesis frequencies induced by the multi-pCDC45-Cas9 system at 93 target sites in the T1 generation.

| Constructs | No.the<br>sgRNA in<br>a vector | relative<br>positon<br>to Cas9<br>in vector | Target<br>gene | promoter | Target sequence      | PAM<br>sequence | length of<br>Target | GC<br>content | mutation<br>efficiency<br>in T1(%) | homozygous<br>ratio |       |       |
|------------|--------------------------------|---------------------------------------------|----------------|----------|----------------------|-----------------|---------------------|---------------|------------------------------------|---------------------|-------|-------|
| CDC45-1    | 6                              | F1                                          | At3g22490      | AtU6     | GGCTTATCAGCGAGTTCAC  | CGGAG           | 19                  | 52.63         | 83.33                              | 0.00                |       |       |
|            |                                |                                             | At3g22500      |          | GGGCTTATCAGCGAGTTCAC | CGGAG           | 20                  | 55.00         | 83.33                              | 0.00                |       |       |
|            |                                | F2                                          | At3g22490      | AtU3b    | ACTCACCCCTGGTGGTGTAG | CGGCT           | 19                  | 57.89         | 66.67                              | 8.33                |       |       |
|            |                                |                                             | At3g22500      |          | ACTCACCCCTGGTGGTGTAG | CGGCT           | 19                  | 57.89         | 83.33                              | 8.33                |       |       |
|            |                                | F3                                          | At1g03120      | At7SL    | CACGGCCACATGATCAATA  | CGGCA           | 19                  | 47.37         | 8.33                               | 0.00                |       |       |
|            |                                | R4                                          | At5g53260      | AtU6     | CGGATTCAGCAACACCTCC  | AGGAA           | 19                  | 57.89         | 91.67                              | 8.33                |       |       |
|            |                                |                                             | At5g53270      |          | CGGATTCAGCAACACCTCC  | AGGAA           | 19                  | 57.89         | 100.00                             | 0.00                |       |       |
|            |                                | R5                                          | At5g53260      | AtU3b    | GTGGCTGCCATAAAAAGAGG | TGGAA           | 19                  | 52.63         | 100.00                             | 8.33                |       |       |
|            |                                |                                             | At5g53270      |          | TGGCTGCCATAAAAAGAGG  | TGGAA           | 18                  | 55.56         | 91.67                              | 0.00                |       |       |
|            |                                | R6                                          | At5g27980      | At7SL    | AAATCAACCTGTTACCGG   | AGGCC           | 19                  | 47.37         | 0.00                               | 0.00                |       |       |
|            |                                | CDC45-2                                     | 6              | F1       | At1g20440            | AtU6            | ACAGAGGAAGAAGAGCTGT | TGGAT         | 19                                 | 47.37               | 91.67 | 33.33 |
|            |                                |                                             |                |          | At1g20450            |                 | ACAGAGGAAGAAGAGCTGT | TGGAT         | 19                                 | 47.37               | 75.00 | 25.00 |
| F2         | At1g76180                      |                                             |                | AtU3b    | GCTCAAACCTCTGAAGCGAT | CGGAG           | 19                  | 47.37         | 75.00                              | 0.00                |       |       |
| F3         | At4g38410                      |                                             |                | At7SL    | GAGAATGCCCGTGTAACCA  | AGGAG           | 19                  | 52.63         | 41.67                              | 0.00                |       |       |
| R1         | At5g66400                      |                                             |                | AtU6     | GTACTCGTCATACTGCTGC  | TGGAT           | 19                  | 52.63         | 75.00                              | 0.00                |       |       |
| R2         | At3g50980                      |                                             |                | AtU3b    | GAGTAGCTCTAGCTCTAGCT | CGGTA           | 20                  | 50.00         | 100.00                             | 33.33               |       |       |
| R3         | At2g21490                      |                                             |                | At7SL    | CATCAGTCAGGTCGACAAT  | TGGGT           | 19                  | 47.37         | 0.00                               | 0.00                |       |       |
| CDC45-3    | 6                              | F2                                          | At4g39130      | AtU3b    | TGGTGAGGAGTATTGGTGG  | TGGTG           | 19                  | 52.63         | 91.67                              | 0.00                |       |       |
|            |                                | F3                                          | At1g54410      | At7SL    | CTTGTTGCCCTCCTCCAATG | TGGAG           | 19                  | 52.63         | 0.00                               | 0.00                |       |       |

|                 |          |    |           |       |                       |       |    |       |        |       |
|-----------------|----------|----|-----------|-------|-----------------------|-------|----|-------|--------|-------|
|                 |          | R4 | At2g23110 | AtU6  | TGGGGTCTTGATAGACTCG   | AGGTC | 19 | 52.63 | 36.36  | 0.00  |
|                 |          | R5 | At2g23120 | AtU3b | GATAGCCCTTACATGGCGA   | CGGGT | 19 | 52.63 | 9.09   | 0.00  |
|                 |          | R6 | At2g33690 | At7SL | TATGGAACCTCCGGTCACC   | AGGAC | 19 | 52.63 | 0.00   | 0.00  |
| <b>CDC45-4</b>  | <b>2</b> | F1 | At2g41260 | AtU6  | CTCACTCGACATAGTTGAC   | TGGTT | 19 | 47.37 | 100.00 | 65.85 |
|                 |          | F2 | At2g41280 | AtU3b | CTCATGTCTCTCGTTCTCG   | TGGCT | 19 | 52.63 | 18.75  | 0.00  |
| <b>CDC45-5</b>  | <b>2</b> | F1 | At2g41260 | AtU6  | CTCAAGTCTCTCGTTCTCT   | TGGCT | 19 | 47.37 | 56.25  | 0.00  |
|                 |          | F2 | At2g41280 | AtU3b | TGTTGCCGCAGTCAAGCCG   | AGGCC | 19 | 63.16 | 93.75  | 6.25  |
| <b>CDC45-6</b>  | <b>3</b> | F2 | At2g23120 | AtU3b | GATAGCCCTTACATGGCGA   | CGGGT | 19 | 52.63 | 30.00  | 0.00  |
| <b>CDC45-7</b>  | <b>3</b> | F1 | At5g06760 | AtU6  | GAAACGCGTCAGCACAACG   | CGGCC | 19 | 57.89 | 75.00  | 25.00 |
|                 |          | F2 | At2g35300 | AtU3b | TCTGATGGGTTGTACTGTG   | AGGGA | 19 | 47.37 | 58.33  | 16.67 |
|                 |          | F3 | At1g32560 | At7SL | GATATGGCTAGTACAGCCA   | AGGAG | 19 | 47.37 | 50.00  | 0.00  |
| <b>CDC45-8</b>  | <b>3</b> | F1 | At1g01470 | AtU6  | CCTACAACAGGAAGGTCGA   | TGGTT | 19 | 52.63 | 84.62  | 15.38 |
|                 |          | F2 | At2g44060 | AtU3b | GACATTGGTGAGAACTCG    | AGGGA | 19 | 47.37 | 12.50  | 0.00  |
|                 |          | F3 | At2g46140 | At7SL | GCTGGCGAATATCCGACGC   | CGGAA | 20 | 60.00 | 5.88   | 0.00  |
| <b>CDC45-9</b>  | <b>3</b> | F1 | At4g02380 | AtU6  | GACTTACCGGAAGATAGCAT  | TGGAG | 20 | 45.00 | 83.33  | 0.00  |
|                 |          | F2 | At1g02820 | AtU3b | GCTTCAAGCGAGAAGGCACCA | TGGGT | 21 | 57.14 | 100.00 | 36.36 |
|                 |          | F3 | At3g53770 | At7SL | GTAGTCAAGAGAAGCCATCG  | TGGGC | 20 | 50.00 | 83.33  | 33.33 |
| <b>CDC45-10</b> | <b>6</b> | F1 | At4g02380 | AtU6  | GACTTACCGGAAGATAGCAT  | TGGAG | 20 | 45.00 | 91.67  | 8.33  |
|                 |          | F2 | At1g02820 | AtU3b | GCTTCAAGCGAGAAGGCACCA | TGGGT | 21 | 57.14 | 100.00 | 9.09  |
|                 |          | F3 | At3g53770 | At7SL | GTAGTCAAGAGAAGCCATCG  | TGGGC | 20 | 50.00 | 91.67  | 25.00 |
|                 |          | R4 | At4g15910 | AtU6  | TGGCCGCTCGTTCACTCTC   | CGGTG | 19 | 63.16 | 90.00  | 0.00  |
|                 |          | R5 | At3g51810 | AtU3b | GCTTGATGAGAAGGCCAAGCA | AGGAG | 21 | 52.38 | 75.00  | 8.33  |
|                 |          | R6 | At2g40170 | At7SL | CCCGTACCACCTGGCACGA   | CGGTC | 19 | 68.42 | 33.33  | 0.00  |
| <b>CDC45-11</b> | <b>6</b> | F1 | At5g06760 | AtU6  | GAAACGCGTCAGCACAACG   | CGGCC | 19 | 57.89 | 75.00  | 8.33  |
|                 |          | F2 | At2g35300 | AtU3b | TCTGATGGGTTGTACTGTG   | AGGGA | 19 | 47.37 | 50.00  | 16.67 |

|                 |           |                 |           |                     |                       |       |                     |       |        |       |
|-----------------|-----------|-----------------|-----------|---------------------|-----------------------|-------|---------------------|-------|--------|-------|
|                 | F3        | At1g32560       | At7SL     | GATATGGCTAGTACAGCCA | AGGAG                 | 19    | 47.37               | 16.67 | 16.67  |       |
|                 | R4        | At1g01470       | AtU6      | CCTACAACAGGAAGGTCGA | TGGTT                 | 19    | 52.63               | 75.00 | 8.33   |       |
|                 | R5        | At2g44060       | AtU3b     | GACATTGGTGAGAACTCG  | AGGGA                 | 19    | 47.37               | 8.33  | 8.33   |       |
|                 | R6        | At2g46140       | At7SL     | GCTGGCGAATATCCGACGC | CGGAA                 | 20    | 60.00               | 0.00  | 0.00   |       |
| <b>CDC45-12</b> | <b>6</b>  | F1              | At1g72100 | AtU6                | GGCAATAGAAAGGCAAGTGA  | CGGAA | 20                  | 45.00 | 100.00 | 60.00 |
|                 |           | F2              | At2g03850 | AtU3b               | GATCAGTCGAGGCAAGAGAAG | CGGCG | 21                  | 52.38 | 80.00  | 10.00 |
|                 |           | F3              | At2g42540 | At7SL               | GGAGCTGTTCTCACTGGTA   | TGGCT | 19                  | 52.63 | 55.56  | 0.00  |
|                 |           | R4              | At2g03740 | AtU6                | GCACCTCAGCGCAAGAAGTCA | TGGGT | 21                  | 57.14 | 40.00  | 0.00  |
|                 |           | R5              | At2g42530 | AtU3b               | GGTGTGGTACCGTCAGAGT   | TGGCC | 20                  | 55.00 | 88.89  | 0.00  |
|                 |           | R6              | At2g42560 | At7SL               | GGTGACGGAGAGAGAAGTTC  | AGGTG | 20                  | 55.00 | 77.78  | 0.00  |
| <b>CDC45-13</b> | <b>6</b>  | F1              | At4g21020 | AtU6                | TAGATAACGCTAGAGACTCG  | AGGGC | 20                  | 45.00 | 36.36  | 0.00  |
|                 |           | F2              | At4g13230 | AtU3b               | GTCTGTGACAAAGCCACAG   | AGGCT | 19                  | 52.63 | 91.67  | 16.67 |
|                 |           | F3              | At2g36640 | At7SL               | ATTGTGACATCAGCACCAC   | CGGAT | 19                  | 47.37 | 25.00  | 0.00  |
|                 |           | R5              | At3g53040 | AtU3b               | GCTGCAGCCTCAGCTCTCT   | CGGCC | 19                  | 63.16 | 41.67  | 0.00  |
|                 |           | R6              | At3g17520 | At7SL               | GTTGTGTCCAAGCTACGATCG | AGGAA | 21                  | 52.38 | 0.00   | 0.00  |
|                 |           | <b>CDC45-14</b> | <b>6</b>  | F1                  | At1g20440             | AtU6  | ACAGAGGAAGAAGAGCTGT | TGGAT | 19     | 47.37 |
|                 | At1g20450 |                 |           | TGGAT               | 19                    |       | 47.37               | 75.00 | 16.67  |       |
| F2              | At1g76180 |                 |           | AtU3b               | GCTCAAACCTCTGAAGCGAT  | CGGAG | 19                  | 47.37 | 66.67  | 25.00 |
| F3              | At2g36640 |                 |           | At7SL               | ATTGTGACATCAGCACCAC   | CGGAT | 19                  | 47.37 | 16.67  | 0.00  |
| R4              | At3g53040 |                 |           | AtU6                | GATAGGCTCGGTGATGAAGG  | CGGTG | 20                  | 55.00 | 100.00 | 25.00 |
| R5              | At2g44060 |                 |           | AtU3b               | GACATTGGTGAGAACTCG    | AGGGA | 19                  | 47.37 | 45.45  | 18.18 |
| <b>CDC45-15</b> | <b>6</b>  | R6              | At2g42560 | At7SL               | GGTGACGGAGAGAGAAGTTC  | AGGTG | 20                  | 55.00 | 83.33  | 25.00 |
|                 |           | F1              | At4g21020 | AtU6                | TAGATAACGCTAGAGACTCG  | AGGGC | 20                  | 45.00 | 41.67  | 16.67 |
|                 |           | F2              | At4g15910 | AtU3b               | CGCAGAATGTAACAGCAGC   | AGGAT | 19                  | 52.63 | 66.67  | 16.67 |
|                 | F3        | At4g02380       | At7SL     | AGACGTGGTTATGCGGCCA | CGGCG                 | 19    | 57.89               | 25.00 | 0.00   |       |

|                 |          |    |           |       |                        |       |    |       |        |       |
|-----------------|----------|----|-----------|-------|------------------------|-------|----|-------|--------|-------|
|                 |          | R4 | At5g44310 | AtU6  | GAGAGACTCGAGGGCCGACT   | TGGCA | 20 | 65.00 | 91.67  | 58.33 |
|                 |          | R5 | At4g02380 | AtU3b | GACTTACCGGAAGATAGCAT   | TGGAG | 20 | 45.00 | 66.67  | 0.00  |
|                 |          | R6 | At3g53770 | At7SL | GTAGTCAAGAGAAGCCATCG   | TGGGC | 20 | 50.00 | 66.67  | 25.00 |
| <b>CDC45-16</b> | <b>5</b> | F1 | At2g03740 | AtU6  | GCACCTCAGCGCAAGAAGTCA  | TGGGT | 21 | 57.14 | 36.36  | 0.00  |
|                 |          | F2 | At2g03850 | AtU3b | GATCAGTCGAGGCAAGAGAAG  | CGGCG | 21 | 52.38 | 66.67  | 8.33  |
|                 |          | R5 | At2g42530 | AtU3b | GGTGTGGTACCGTCAGAGT    | TGGCC | 20 | 55.00 | 63.64  | 0.00  |
| <b>CDC45-17</b> | <b>6</b> | F1 | At2g18340 | AtU6  | GGGAAATGGTTAGAGTCGA    | CGGCG | 20 | 50.00 | 100.00 | 85.71 |
|                 |          | F3 | At3g17520 | At7SL | GTTGTGTCCAAGCTACGATCG  | AGGAA | 21 | 52.38 | 40.00  | 0.00  |
|                 |          | R4 | At4g36600 | AtU6  | GAACGGAGACAGCAGAGGATA  | TGGTT | 21 | 52.38 | 100.00 | 0.00  |
| <b>CDC45-18</b> | <b>2</b> | F1 | At1g72110 | AtU6  | GGCAATAGAAAGGCAAGTGA   | CGGAA | 20 | 45.00 | 100.00 | 45.45 |
|                 |          | F2 | At1g72110 | AtU3b | GATCACAAAGGTGATGAGGGTC | TGGAA | 22 | 50.00 | 0.00   | 0.00  |
| <b>CDC45-19</b> | <b>6</b> | F1 | At1g20440 | AtU6  | ACAGAGGAAGAAGAGCTGT    | TGGAT | 19 | 47.37 | 50.00  | 20.00 |
|                 |          |    | At1g20450 |       | ACAGAGGAAGAAGAGCTGT    | TGGAT | 19 | 47.37 | 70.00  | 20.00 |
|                 |          | F2 | At1g01470 | AtU3b | CACACCAACGTCTCGAGCC    | AGGTT | 19 | 63.16 | 66.67  | 33.33 |
|                 |          | F3 | At1g54410 | At7SL | CTTGTTGCCTCCTCCAATG    | TGGAG | 19 | 52.63 | 8.33   | 0.00  |
|                 |          | R4 | At4g02380 | AtU6  | GACTTACCGGAAGATAGCAT   | TGGAG | 20 | 45.00 | 91.67  | 16.67 |
|                 |          | R5 | At4g15910 | AtU3b | CGCAGAATGTAACAGCAGC    | AGGAT | 19 | 52.63 | 75.00  | 25.00 |
| <b>CDC45-20</b> | <b>6</b> | R6 | At5g66400 | At7SL | GGTGGCCAAGGATACGGAAC   | CGGGA | 20 | 60.00 | 25.00  | 8.33  |
|                 |          | F1 | At5g06760 | AtU6  | GAAACGCGTCAGCACAACG    | CGGCC | 19 | 57.89 | 100.00 | 8.33  |
|                 |          | F2 | At4g15910 | AtU3b | CGCAGAATGTAACAGCAGC    | AGGAT | 19 | 52.83 | 100.00 | 16.67 |
|                 |          | F3 | At5g66400 | At7SL | GGTGGCCAAGGATACGGAAC   | CGGGA | 20 | 60.00 | 41.67  | 0.00  |
|                 |          | R4 | At1g52690 | AtU6  | GACAAGACAGGAAGCTACATGT | CGGAA | 22 | 45.45 | 58.33  | 0.00  |
|                 |          | R5 | At2g23120 | AtU3b | GATAGCCCTTACATGGCGA    | CGGGT | 19 | 52.63 | 50.00  | 0.00  |
|                 |          | R6 | At4g02380 | At7SL | AGACGTGGTTATGCGGCCA    | CGGCG | 19 | 57.89 | 8.33   | 0.00  |

20 binary vectors with 56 sgRNAs were introduced into *Arabidopsis* by the flower dip method. The PAM sequences are shown in red.

**Table S7.** List of primers used in the study.

---

|            |                                              |
|------------|----------------------------------------------|
| YAO-F      | TCAGCCCGGGACAAATAGAGGTAGGGGGAGAGTT           |
| YAO-R      | TGAGCCATGGTCTTCTCTCTCTCACTCCCTCTTAG          |
| CDC45-F    | TTTAAGCTTCTCCTGATGATAAAGGTGGGAG              |
| CDC45-R    | TTTCTCGAGTTCCGTGAAATTGAATCACCC               |
| DMC1-F     | AAAGTCGACCAGGGAATGTTCCAATATAAGAC             |
| DMC1-R     | TTTCTCGAGTTTCTCGCTCTAAGAGTCTCTAAG            |
| SPO11-F    | CCATGGGCATTTGCAGCTCGTCTGG                    |
| SPO11-R    | CTCGAGCTCTTTCGAGTTTCAAAACTGAAA               |
| VU6-1F     | AACGACGGCCAGTGCCAAGCTTCATTCGGAGTTTTTGTATCTTG |
| VU6-R      | GTTATCCATCACAGGCTCGAGCCATTTGTCTGCAGAATTGGC   |
| VU6-1R     | CTTTATCATCAGGAGGTCGACCCATTTGTCTGCAGAATTGGC   |
| VU3-F      | CTCGAGCCTGTGATGGATAAC                        |
| VU3-R      | GCCAATTTACCAGCATCTAGACCATTTGTCTGCAGAATTGGC   |
| VU3-1R     | CTTTATCATCAGGAGGTCGACCCATTTGTCTGCAGAATTGGC   |
| V7SL-F     | TCTAGATGCTGGTAAATTGGC                        |
| V7SL-1R    | CTTTATCATCAGGAGGTCGACGCCATTTGTCTGCAGAATTGGC  |
| VU6-2F     | ATGTTACTAGATCGGCCCCGGGCATTCGGAGTTTTTGTATC    |
| VU3-2R     | AATTCGAGCTCGGTACCCGGGCCATTTGTCTGCAGAATTGGC   |
| V7SL-2R    | AATTCGAGCTCGGTACCCGGGGCCATTTGTCTGCAGAATTG    |
| 1300-F     | GGCGATTAAGTTGGGTAACG                         |
| CDC45-R    | GACATTGGTCTAGAGTTACAG                        |
| NOS-F      | CGCGCGCGGTGTCATCTATG                         |
| 1300-R     | CTCGTATGTTGTGTGGAATTG                        |
| AtGL2-F    | AGTTAGGGTTCAGTTGCATG                         |
| AtGL2-R    | AGTTATAGTAGCTGGTAACAG                        |
| GL2-sg97-F | GATTGTCGGAGCATGAAGCCTGCA                     |
| GL2-sg97-R | AAACTGCAGGCTTCATGCTCCGAC                     |

|         |                                      |
|---------|--------------------------------------|
| YAOT-F  | ATGCGGATCCGCATAAGTATTTTCATTGGGAT     |
| YAOT-R  | ATGCGAATCCCGGCGAATCGAGGTATGGCTAC     |
| YAOT-F1 | CTACTACTTGAATGAATTGTCTTAAGTCAAGCTTAG |
| YAOT-R1 | CAATTCATTCAAGTAGTAGGCTCT             |

---

## Methods S1

**Materials:** Backbone vectors: pAtU6-sgR(Amp+); pAtU3b- sgR (Amp+); pAt7SL- sgR (Amp+); pCDC45-Cas9-1300(Kan+).

Restriction enzyme: *BbsI*; *HindIII*; *Sall*; *XmaI*, T4 DNA Ligase, ClonExpress MultiS One Step Cloning Kit (Catlog #C113, [http://en.vazyme.com/products\\_detail/productId=67.html](http://en.vazyme.com/products_detail/productId=67.html)).

## Methods

Design and synthesize two oliogs of the sgRNA

### For pAtU6-sgR:

CF: 5' -GATTGNNNNNNNNNNNNNNNNNNNN -3'

CR: 3' - CNNNNNNNNNNNNNNNNNNNNCAA-5'

### For pAtU3b-sgR:

CF: 5' -GGTCGNNNNNNNNNNNNNNNNNNNN -3'

CR: 3' - CNNNNNNNNNNNNNNNNNNNNCAA-5'

### For pAt7SL-sgR:

CF: 5' -TTACGNNNNNNNNNNNNNNNNNNNN -3'

CR: 3' - CNNNNNNNNNNNNNNNNNNNNCAA-5'

## Oligo annealing and cloning into the corresponding backbone vectors.

1. Digest 1µg of pAtu6-sgR, pAtU3b-sgR, pAt7SL-sgR with *BbsI* for 2h at 37°C.

1µg pAtu6-sgR or pAtU3b-sgR or pAt7SL-sgR

1µL *BbsI* -HF (20 U/µL ,NEB)

2µL 10 x CutSmart Buffer

Up to 20µL ddH2O

2. Gel purified digested pAtu6-sgR, pAtU3b-sgR, pAt7SL-sgR using Gel Extraction Kit and elute in EB solution.

3. Phosphorylate and anneal each pair of oligos:

1  $\mu$ L oligo 1 (100mM)

1  $\mu$ L oligo 2 (100mM)

1  $\mu$ L 10 x T4 Ligation Buffer

0.5  $\mu$ L T4 Polynucleotide Kinase (10 U/ $\mu$ L ,NEB)

Up to 10 $\mu$ L ddH<sub>2</sub>O

Anneal in a thermocycler using the following parameters:

37°C 30 min

95°C 5 min and then ramp down to 25°C at 5°C/min

4. Set up ligation reaction and incubate at 22°C for 30 min:

X  $\mu$ L *Bbs*I digested pAtU6-sgR, pAtU3b-sgR or pAt7SL-sgR from step 2

1  $\mu$ L annealed oligo duplex from step 3

1  $\mu$ L 10 x T4 ligase Buffer

1  $\mu$ L T4 DNA Ligase (400 U/ $\mu$ L , NEB)

Up to 10 $\mu$ L ddH<sub>2</sub>O

5. Transformation and identify positive clone by Colony PCR (primer M13F+CR or CF+M13R).

**SgRNA cloned into binary vector(pCDC45-Cas9-1300)**

1, Amplify the sgRNA-cassette (pAtU6-sgRNA, pAtU3b-sgRNA, pAt7SL-sgRNA) with corresponding primer pairs and purified the PCR products.

Primers: pAtU6-sgRNA VU6-1F+VU6-R

pAtU3b-sgRNA VU3-F+VU3-R

pAt7SL-sgRNA V7SL-F+V7SL-1R

2, Digest 1 $\mu$ g of pCDC45-Cas9-1300 with *Hind*III and *Sal*I and purified the constructs.

3, Set up Homologous recombination reaction and incubate at 37°C for 30 min:

4  $\mu$ L 5x CE MutiS Buffer (Vazyme)

2  $\mu$ L Exnase MutiS (Vazyme)

X  $\mu$ L Fragment 1 (step 1)

X  $\mu$ L Fragment 2 (step 1)

X  $\mu$ L Fragment 3 (step 1)

X  $\mu$ L digested vector (step 2)



Up to 20  $\mu\text{L}$  ddH<sub>2</sub>O

Transformation and select the correct clone by Colony PCR (1300-F+CDC45-R) for the 3sgRNA-pCDC45-Cas9-1300.

4, Amplify the sgRNA-cassette (pAtU6-sgRNA, pAtU3b-sgRNA, pAt7SL-sgRNA) with corresponding primer pairs and purified the PCR products.

Primers: pAtU6-sgRNA VU6-2F+VU6-R

pAtU3b-sgRNA VU3-F+VU3-R

pAt7SL-sgRNA V7SL-F+V7SL-2R

5, Digested 1 $\mu\text{g}$  of 3sgRNA-CDC45-Cas9-1300 with *Xma*I and purified the construct.

6, Set up Homologous recombination reaction and incubate at 37°C for 30 min:

4  $\mu\text{L}$  5x CE MutiS Buffer (Vazyme)

2  $\mu\text{L}$  Exnase MutiS (Vazyme)

X  $\mu\text{L}$  Fragment 1(step 4)

X  $\mu\text{L}$  Fragment 2 (step 4)

X  $\mu\text{L}$  Fragment 3 (step 4)

X  $\mu\text{L}$  digested vector(step 5)

Up to 20  $\mu\text{L}$  ddH<sub>2</sub>O

Transformation and select the correct clone by Colony PCR (NOS-F+1300-R) for the 6sgRNA-pCDC45-Cas9-1300

List of primers used for construction of the multi-pCDC45-Cas9-1300.

|             | <b>6sgRNA</b>  | <b>5sgRNA</b>  | <b>4sgRNA</b> | <b>3sgRNA</b>  | <b>2sgRNA</b> | <b>1sgRNA</b> |       |
|-------------|----------------|----------------|---------------|----------------|---------------|---------------|-------|
|             | PRIMER         | PRIMER         | PRIMER        | PRIMER         | PRIMER        | PRIMER        |       |
| AtU6-sgRNA  | VU6-1F+VU6-R   | VU6-1F+VU6-R   | VU6-1F+VU6-R  | VU6-1F+VU6-R   | VU6-1F+VU6-R  | VU6-1F+VU6-1R | step1 |
| AtU3b-sgRNA | VU3-F+VU3-R    | VU3-F+VU3-R    | VU3-F+VU3-1R  | VU3-F+VU3-R    | VU3-F+VU3-1R  |               | step1 |
| At7SL-sgRNA | V7SL-F+V7SL-1R | V7SL-F+V7SL-1R |               | V7SL-F+V7SL-1R |               |               | step1 |
| AtU6-sgRNA  | VU6-2F+VU6-R   | VU6-2F+VU6-R   | VU6-2F+VU6-R  |                |               |               | step4 |
| AtU3b-sgRNA | VU3-F+VU3-R    | VU3-F+VU3-2R   | VU3-F+VU3-2R  |                |               |               | step4 |
| At7SL-sgRNA | V7SL-F+V7SL-2R |                |               |                |               |               | step4 |

### Primer list

VU6-1F AACGACGGCCAGTGCCAAGCTTCATTCGGAGTTTTTGTATCTTG

VU6-R GTTATCCATCACAGGCTCGAGCCATTTGTCTGCAGAATTGGC

VU6-1R CTTTATCATCAGGAGGTCGACCCATTTGTCTGCAGAATTGGC

VU3-F CTCGAGCCTGTGATGGATAAC

VU3-R GCCAATTTACCAGCATCTAGACCATTTGTCTGCAGAATTGGC

VU3-1R CTTTATCATCAGGAGGTCGACCCATTTGTCTGCAGAATTGGC

V7SL-F TCTAGATGCTGGTAAATTGGC

V7SL-1R CTTTATCATCAGGAGGTCGACGCCATTTGTCTGCAGAATTGGC

VU6-2F ATGTTACTAGATCGGCCCGGGCATTCCGGAGTTTTTGTATC

VU3-2R AATTCGAGCTCGGTACCCGGGCCATTTGTCTGCAGAATTGGC

V7SL-2R AATTCGAGCTCGGTACCCGGGGCCATTTGTCTGCAGAATTG

1300-F GGCGATTAAGTTGGGTAACG

CDC45-R GACATTGGTCTAGAGTTACAG

NOS-F CGCGCGGGTGTCATCTATG

1300-R CTCGTATGTTGTGTGGAA

PROMOTER SEQUENCE

*pCDC45*

ctcctgatataaaagggtgggagtgatcattatftatataaaaaagtaagaataatcatatggaaaaaaaaattggtctgttacaagaagtaaacctatg  
gtttataaatccttgacaagaataaaaaataaaaaatcaaattaggaaaaacaaaaatcggcatgatcatggctaattaggtttgatcatctctagatt  
cttaatagtttttctgttagtagtaaatgacgaacacatttgcacactgtaactctagaccaatgctgtaaaatactttacaattgaggtaatgatacaa  
atataaagattaaagcaatgctaataatgtaataagcaaatataacattataaaaaatgtttgaaagataattgtttgactttgactagtcgtaagtag  
caattactagagatgaggaattgataagattaaggatgtattcactatgagatfttagagttagctttgaaagagtgcaaatggaatatcatgttggggg  
aaaaattatgcttgaagggtggaataagcattggaagccgatgatgtgagatatacattacaatggtctcgtaatcagggtgctaaatattgcaagg  
acatgcggtgtgaattatcattgattcacaataaccatgggtaaatgtgtaattgcaaaagtagtaaggagtggaattggaattgtgataca  
ttgctgtcaatgttgaataatgtaactttggtggtgctgcaaaaaaaaggctagccaaatgtgtagaacgaagccgaatatctactacaagatt  
gctactctatagatgttgaatgggggtcccaaccacttataaaaggatcaagatcaagaaaaggagaacatgaagttaagggttgtgtgtgata  
tccttcattgaatgtggctcctagatgttgagttcatgtttttcttctacatcattaggtgcaactgattgtttgtagctgtttgctcatatatacaaa  
attctgatagaattggaacacatgtttgtttatggtattagcatatgttactcattatacacacaagtacataagttattgtgacaaaagtctgatattat  
gtgaagggttagagaatccgtggagggtggtgacgtaaatgactgttggatgtgtaaatctttgtaattttctccagcttaattacatcctc  
aaatgccaatgattcaatgtagtgaatctcctgcacaaccgcaagacacctgctcaaaacaaaacaacaaaattgtttcgaattgcttttaacttt  
ggtttctgtacaaaaaactaatacaaaagggtgcatgagtagtagtaactgaataaataataagtgcaaatgtgacttaaaataagaagttgaaagag  
ttgaatgattcatctcactttttaccatttgagataaataagttgaaaattgattcaactattcaaccacaaaattagaaaactaaaccaattataaaaa  
cgaattgtcaacccttcatctactattttgagaggaattgattaaatgatgtcaacttttttcaactcaaaatttctatcatttatatactgcaattc  
attgcaactgaaatgtttttcgtgcaaaactctagtttgaaccctgatacatccaacaataactagatttgaatcaataatattttcatatata  
aaacaattaaaattcttttagataaataaaaaatgtatgacacacagacacagctggtgattgtttattgaattttgactaggattaagaacattaa  
tcatcaaccgtgattatataagcaagttgaagaaaaggcacggtcagattcactctctcatatgatgcgttacataagatccttccctcttccctcat  
ttcaggtcagcggccatgcaaaaactttggcgtcgtatcaaaaatttcgaaattgagatttcgccggcaafacacaaaccgaaaatgaata  
acactcaaaatttcattaccagaagaaagaaatcaaatcctcagatctctatctcctcattcacacaccctctctctctctctctctctctctctt  
ctctatctcctctttgtccgttcgcatcctctaatcatcgtcaacaagccgacgaagagagaacgaatcgaagttcgttacttgaagctaccaga  
agaatcaaatctcaggtactttctgtgattgatctgggcactgctattagggatttgattggatctacaaaattctgccttctgggtgattcaattca  
cggaa

*pDMC1*

cagggaatgtccaatataagacacttfaaacgtaagtttagacaatatagacacttccaagttagaggcacttttctcttttgaaggaaaactgactt  
ttatacctcttaactaaacaatcgaaaacaataactaaatataatcttaaccaacaataaaaaataaaaagaatttagatagctgatttataatagacc



gccttgtttatctctcctcaccgtagctctcgtcgttattctcccgttctcaccgttctatcttactctggccacttttctccacggctctttctcg  
ctgccgtttcttctcgcacgcacctccgatctcccgttctgtctaccatcatcccaggcgaaggcgaggcttaaaagtgccggcggagggttc  
ttgactatgctcgtcggcggacaacacgaagacattctctttagatgcttcacaaactgactaagtagagacctctctgttcttaattccttaagtattcc  
gtaattagttgtccttttaatactagagaaaataaatacaaaatgtaataatctcagaggaaataaatcttgcttaagttatgcttctatattactattt  
aatcttatgttctgttaggcgcgaggctctttcttaggtatctctcattagttatagctacaagattacattgcattgatatatgatttactttcaaaa  
aaaattaaatgtgaacgaccttaaaatccgtcgtcttacttttaaatcttccgaatgaaaccaaccaccgacgcgacagctttcattgttactaatt  
aaacggaacaaagcaattaaatgttatcagtggtgttttagttagaaatactataaataacaagatgccctttgttttagaaccttttgggtatcatga  
attcgttatcggataaaatagctaaagtaagtagtatattcttagattatataaaataggtgagcaatctatcatagagaagaatgattaaaataagtg  
tatggcataatagattcgaacatttgggtatgttctcactcagtgccgagcataaagcttatgaacaaatctcgaccactagaagtctagaactaattcta  
tagttaccatacacattaatatttcaaattagtgccatgattatttattggcatcactaaaatgtctccaagtctgaataaatcgatttatattggttga  
ttgttatcatgaatcttttcacaatcacttgcctagttcggatcgggcctaaaagccaacggccaacgtgttataaacacatgcgttttaaatgac  
acgtcagttacgtatcggcctaaatgccaatggccaacgtcatggaaagtaggaactaaacgacacgcattgtaaatcgaaggtttaaaggca  
agcttttcgacccatcccttttctcccgtctacaaaatcgtcgaccattgcattttcagtttgaactcgaagag
